# Supplementary material
Source: publisher site journal article supplement (https://www.spandidos-publications.com/736/downloadSupplementary)

Figure S1. (A) Morphologies of MCF-7 cell spheroids in the absence and presence of fulvestrant after 3, 6 and 9 days in 3D culture. (B) Mass of living MCF-7 cells after 4, 7, 11 and 14 days in 3D culture in the presence and absence of fulvestrant, as measured by an ATP/luciferase-based assay. (C) Immunocytochemical analysis of a cross-section of a 3-day-MCF-7-cell-spheroid for the expression of Ki67.

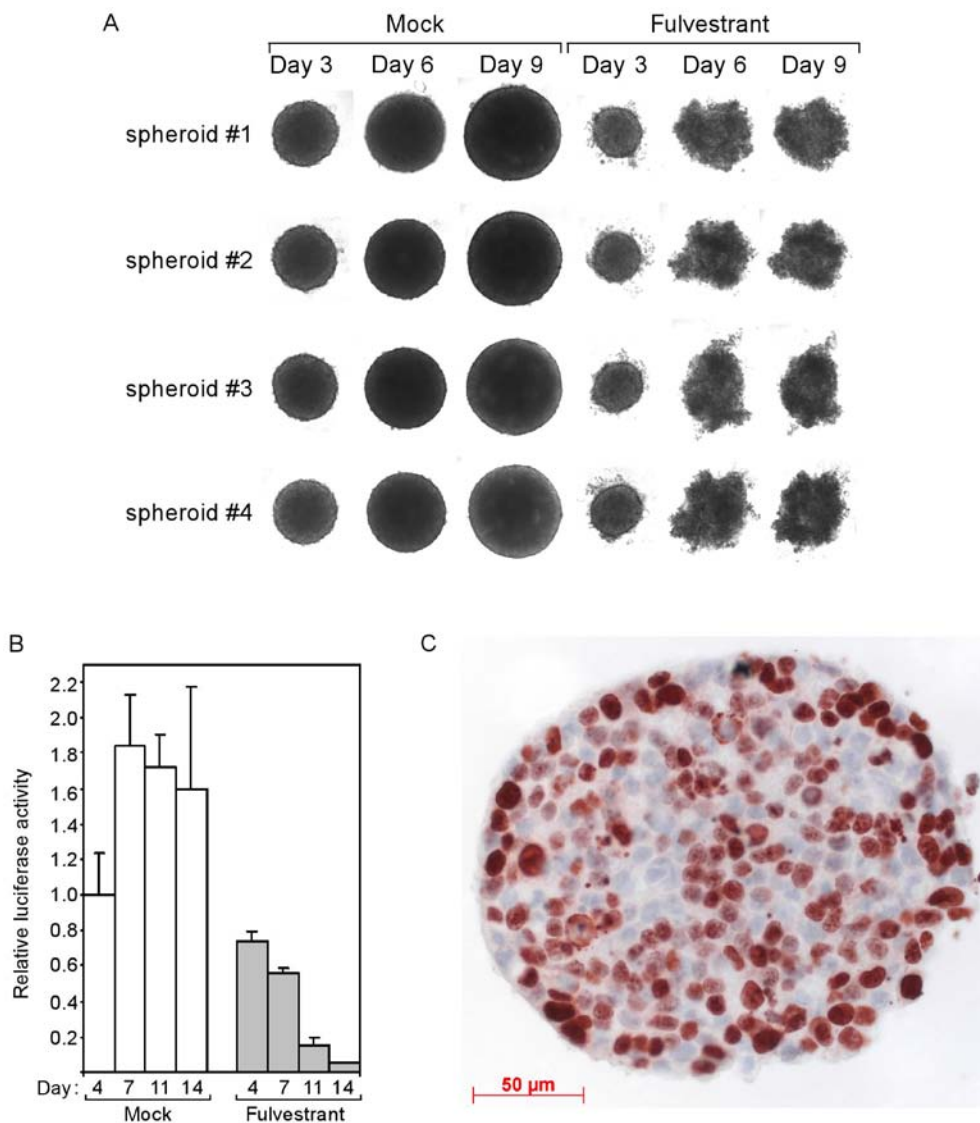

Figure S2. Western blot analysis of breast cancer cell lines for the expression and activities of proteins as indicated.

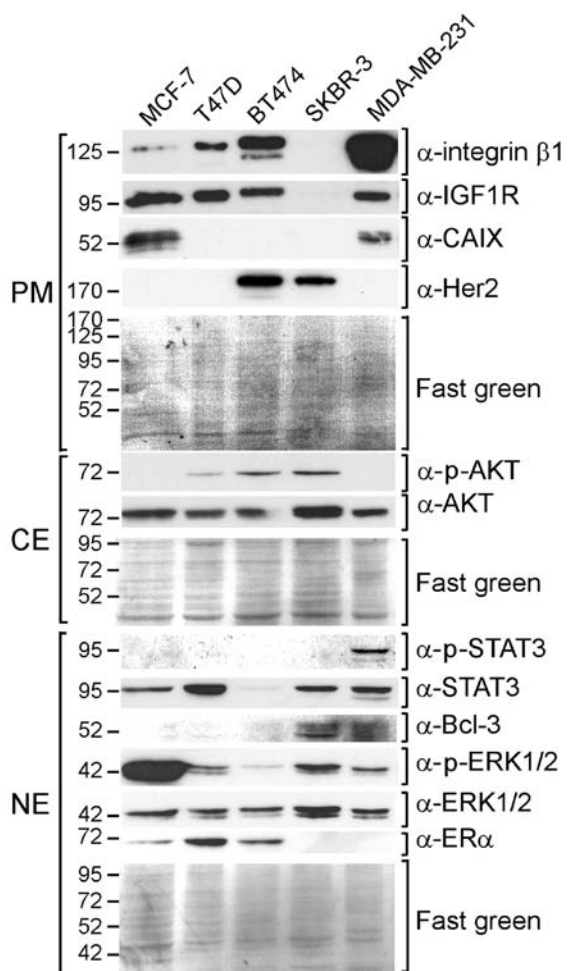

Supplement: Supplementary file 1 [file downloadSupplementary]
